# Supplementary material for: Hydrazine solution processed Sb2S3, Sb2Se3 and Sb2(S1−xSex)3 film: molecular precursor identification, film fabrication and band gap tuning
Source: PubMed Central journal article supplement (PMC4455288; doi:10.1038/srep10978), 2015-06-04
Supplement: srep10978-s1.pdf [file srep10978-s1.pdf]

# Supplementary Information

## Hydrazine solution processed $\text{Sb}_2\text{S}_3$ , $\text{Sb}_2\text{Se}_3$ and $\text{Sb}_2(\text{S}_{1-x}\text{Se}_x)_3$ film: molecular precursor identification, film fabrication and band gap tuning

Bo Yang<sup>1,2+</sup>, Ding-Jiang Xue<sup>1,2+</sup>, Meiyong Leng<sup>1,2</sup>, Jie Zhong<sup>1,2</sup>, Liang Wang<sup>1,2</sup>, Huaibing Song<sup>1,2</sup>, Ying Zhou<sup>1,2</sup>, Jiang Tang<sup>1,2\*</sup>

<sup>1</sup>Wuhan National Laboratory for Optoelectronics (WNLO), and <sup>2</sup> School of Optical and Electronic Information, Huazhong University of Science and Technology (HUST), Wuhan, 430074, China

<sup>+</sup>These authors contribute equally to this work.

\*Correspondence and requests for materials should be addressed to J. T. (E-mail:

[jtang@mail.hust.edu.cn](mailto:jtang@mail.hust.edu.cn))

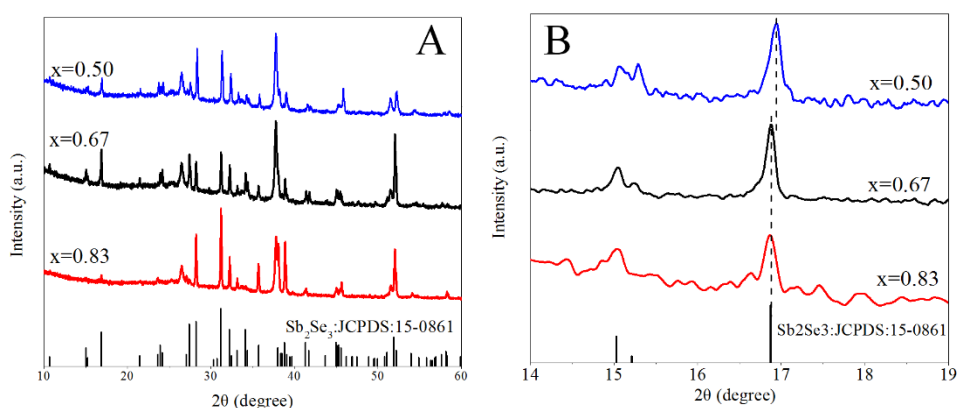

**Figure S1** | A) From bottom to top, XRD patterns of the  $\text{Sb}_2(\text{S}_{1-x}\text{Se}_x)_3$  ( $0 \leq x \leq 1$ ) alloy films with their Se concentration in the precursor solutions indicated; B) (020) and (120) XRD peaks of the same films as in panel A.

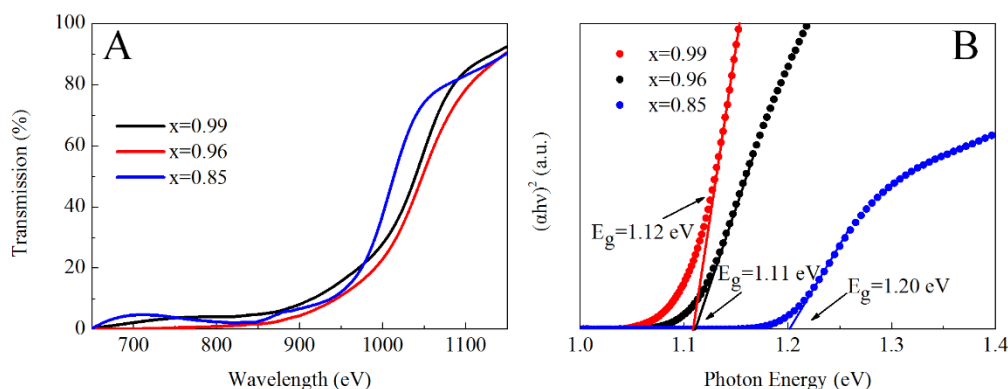

**Figure S2** | A) UV-vis-NIR transmission spectra of  $\text{Sb}_2(\text{S}_{1-x}\text{Se}_x)_3$  ( $0 \leq x \leq 1$ ) alloy films marked with their selenium concentration  $x$  of 0.99, 0.96, and 0.85, respectively. All of the samples were

annealed at 300 °C for 8 min. B) Plots of  $(\alpha h\nu)^2$  vs the photon energy ( $h\nu$ ) reveal the band-gaps of  $\text{Sb}_2(\text{S}_{1-x}\text{Se}_x)_3$  ( $0 \leq x \leq 1$ ) alloy films as 1.12, 1.11, and 1.10 eV for  $x = 0.99$ , 0.96, and 0.85, respectively;
